# Supplementary material for: A selective colorimetric and ratiometric fluorescent probe for hydrogen sulfide
Source: Royal Society of Chemistry journal article supplement (doi:10.1039/c2ob26235e), 2012-01-01

## Supporting Information

### A Selective Colorimetric and Ratiometric Fluorescent Probe for Hydrogen Sulfide

Ming-Yu Wu, Kun Li\*, Ji-Ting Hou, Zheng Huang and Xiao-Qi Yu\*

College of Chemistry, Key Laboratory of Green Chemistry and Technology, Ministry of Education,

Chengdu, 610064, P. R. China

E-mail: xqyu@scu.edu.cn

#### Content:

|                                                                                                                            |    |
|----------------------------------------------------------------------------------------------------------------------------|----|
| 1. Quantum Yields .....                                                                                                    | S2 |
| 2. The isosbestic point of probe 1 .....                                                                                   | S2 |
| 3. Detection limit .....                                                                                                   | S2 |
| 4. The excitation spectrum of the probe 1, 2, 3 and their reaction product.....                                            | S3 |
| 5. The image of the probes in the absence and presence of H <sub>2</sub> S under natural light as well as<br>UV light..... | S4 |
| 6. HRMS.....                                                                                                               | S5 |
| 7. <sup>1</sup> H NMR and <sup>13</sup> C NMR spectra .....                                                                | S7 |

### 1. Quantum Yields.

Quantum yields were determined using fluorescein as a standard according to a published method.<sup>1</sup> The quantum yield was calculated according to the equation: ( $\Phi_{\text{sample}} = \Phi_{\text{standard}} * (I_{\text{sample}} / I_{\text{standard}}) * (A_{\text{sample}} / A_{\text{standard}})$ ); where  $\Phi$  is the quantum yield,  $\Phi_{\text{standard}} = 0.85$  in 0.1 M NaOH;  $I_{\text{sample}}$  and  $I_{\text{standard}}$  are the integrated fluorescence intensities of the sample and the standard,  $A_{\text{sample}}$  and  $A_{\text{standard}}$  are the optical densities, at the excitation wavelength, of the sample and the standard, respectively.

Quantum yield of Probe 1:  $\Phi = 0.023$ . Quantum yield of Probe 3:  $\Phi = 0.029$

After the complete reaction with H<sub>2</sub>S, the Quantum yield of Probe 1:  $\Phi = 0.236$  Quantum yield of Probe 3:  $\Phi = 0.386$

### 2. The isosbestic point of probe 1.

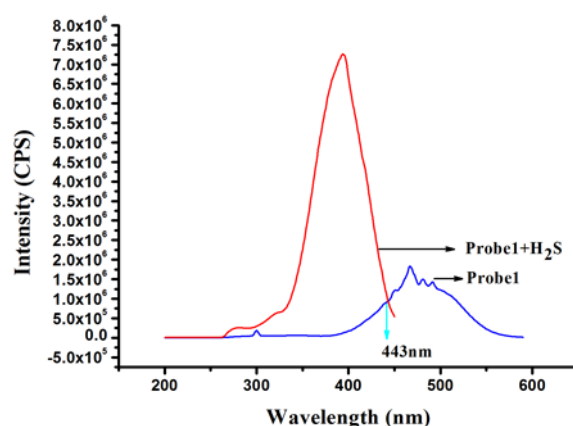

**Fig. S1** The excitation spectrum of **Probe 1** and Probe + H<sub>2</sub>S in DMF (Slit: 2 nm/3 nm).

### 3. Detection limit.

The detection limit was calculated based on the fluorescence titration.<sup>2</sup> Probe 1 was employed at 10  $\mu$ M and the slit was adjusted to 2 nm/3 nm. To determine the S/N ratio, the emission intensity of Probe 1 without Na<sub>2</sub>S was measured by 10 times and the standard deviation of blank measurements was determined. Under the present conditions, a good linear relationship between the fluorescence intensity and the Na<sub>2</sub>S concentration could be obtained in the 0 – 20  $\mu$ M ( $R = 0.9915$ ), as shown in Fig. S7. The detection limit is then calculated with the equation: detection limit =  $3\sigma_{\text{bi}}/m$ , where  $\sigma_{\text{bi}}$  is the standard deviation of blank measurements,  $m$  is the slope between intensity versus sample concentration. The detection limit was measured to be 2.5  $\mu$ M at S/N = 3 (signal-to-noise ratio of 3:1).

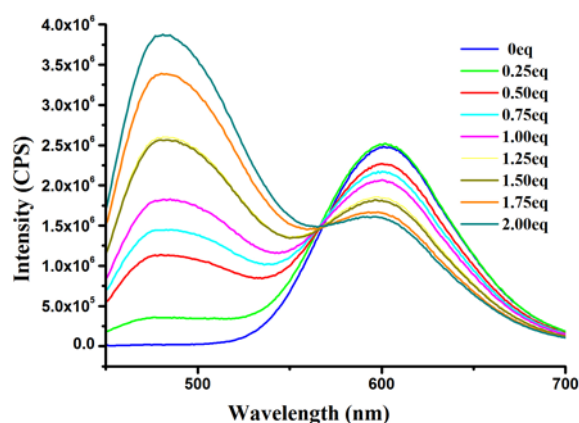

A

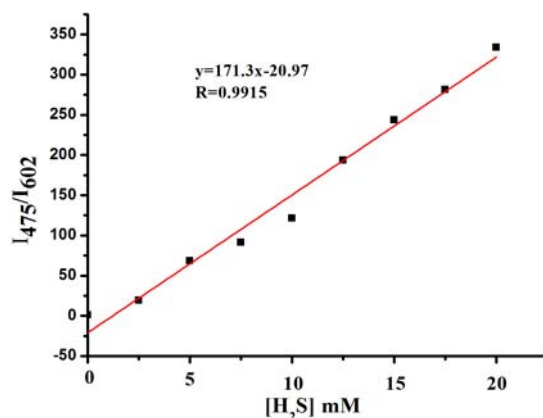

B

**Fig. S2** (A) Fluorescence response of Probe 1 (10  $\mu$ M) to  $\text{H}_2\text{S}$  (0, 2.5, 5.0, 7.5, 10.0, 12.5, 15.0, 17.5, 20.0  $\mu$ M, 0-2 eq) ( $\lambda_{\text{ex}} = 443$  nm. Slit: 2 nm/3 nm,  $\lambda_{\text{scan}} = 450 - 700$  nm) in DMF. (B) Fluorescence intensity ratio at 475 nm and 602 nm ( $I_{475}/I_{602}$ ) of Probe 1 (10  $\mu$ M) upon addition of  $\text{H}_2\text{S}$  (0–20  $\mu$ M, 0-2 eq) ( $\lambda_{\text{ex}} = 443$  nm. Slit: 2 nm/3 nm) in DMF.

#### 4. The excitation spectrum of the probe 1, 2, 3 and their reaction product.

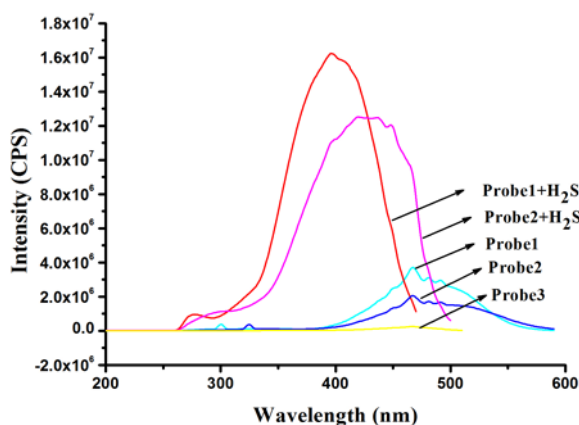

S3

5. The image of the probes in the absence and presence of H<sub>2</sub>S under natural light (A) as well as UV light (B,  $\lambda = 254$  nm).

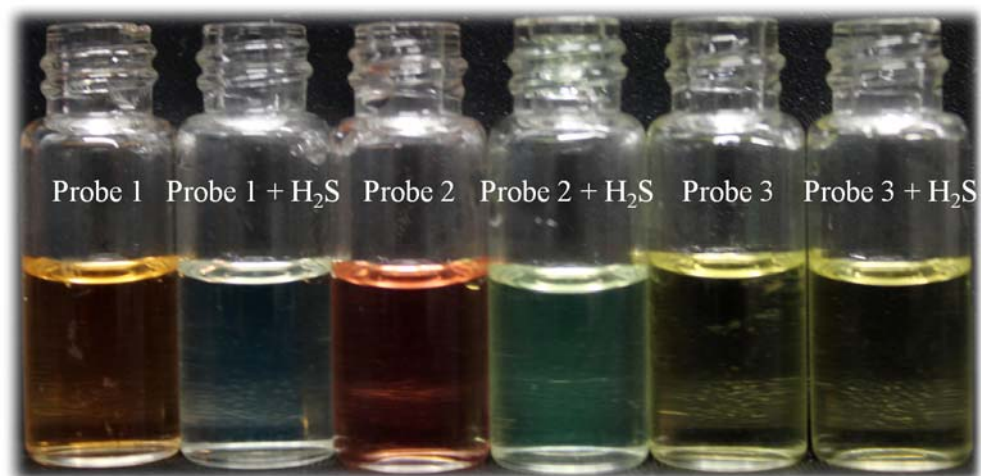

A

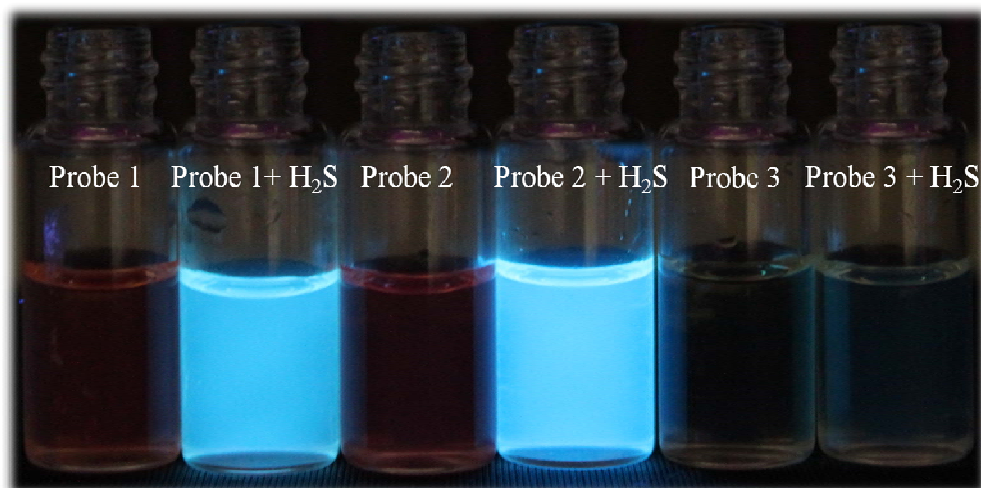

B

**Reference:**

1. B. C. A. Parker, W. T. Rees, *Analyst*, 1960, **85**, 587.
2. B. P. Joshi, J. Park, W. I. Lee and K. Lee, *Talanta.*, 2009, **78**, 903.

6. HRMS.

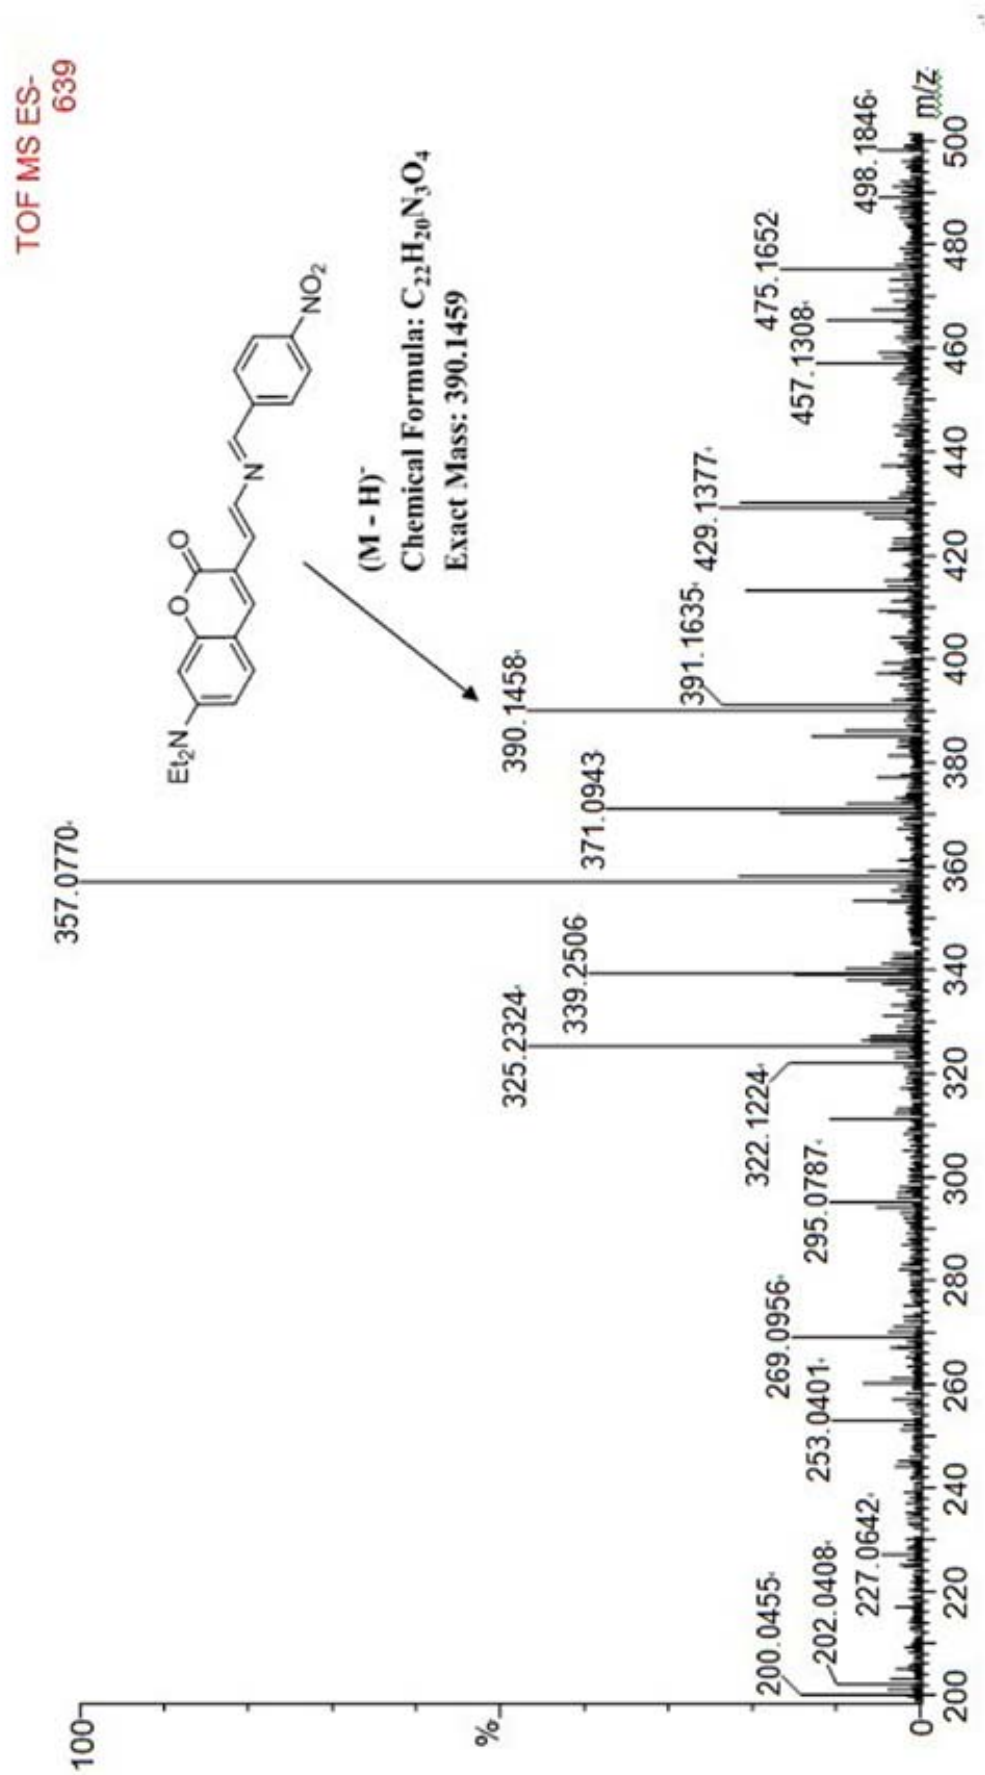

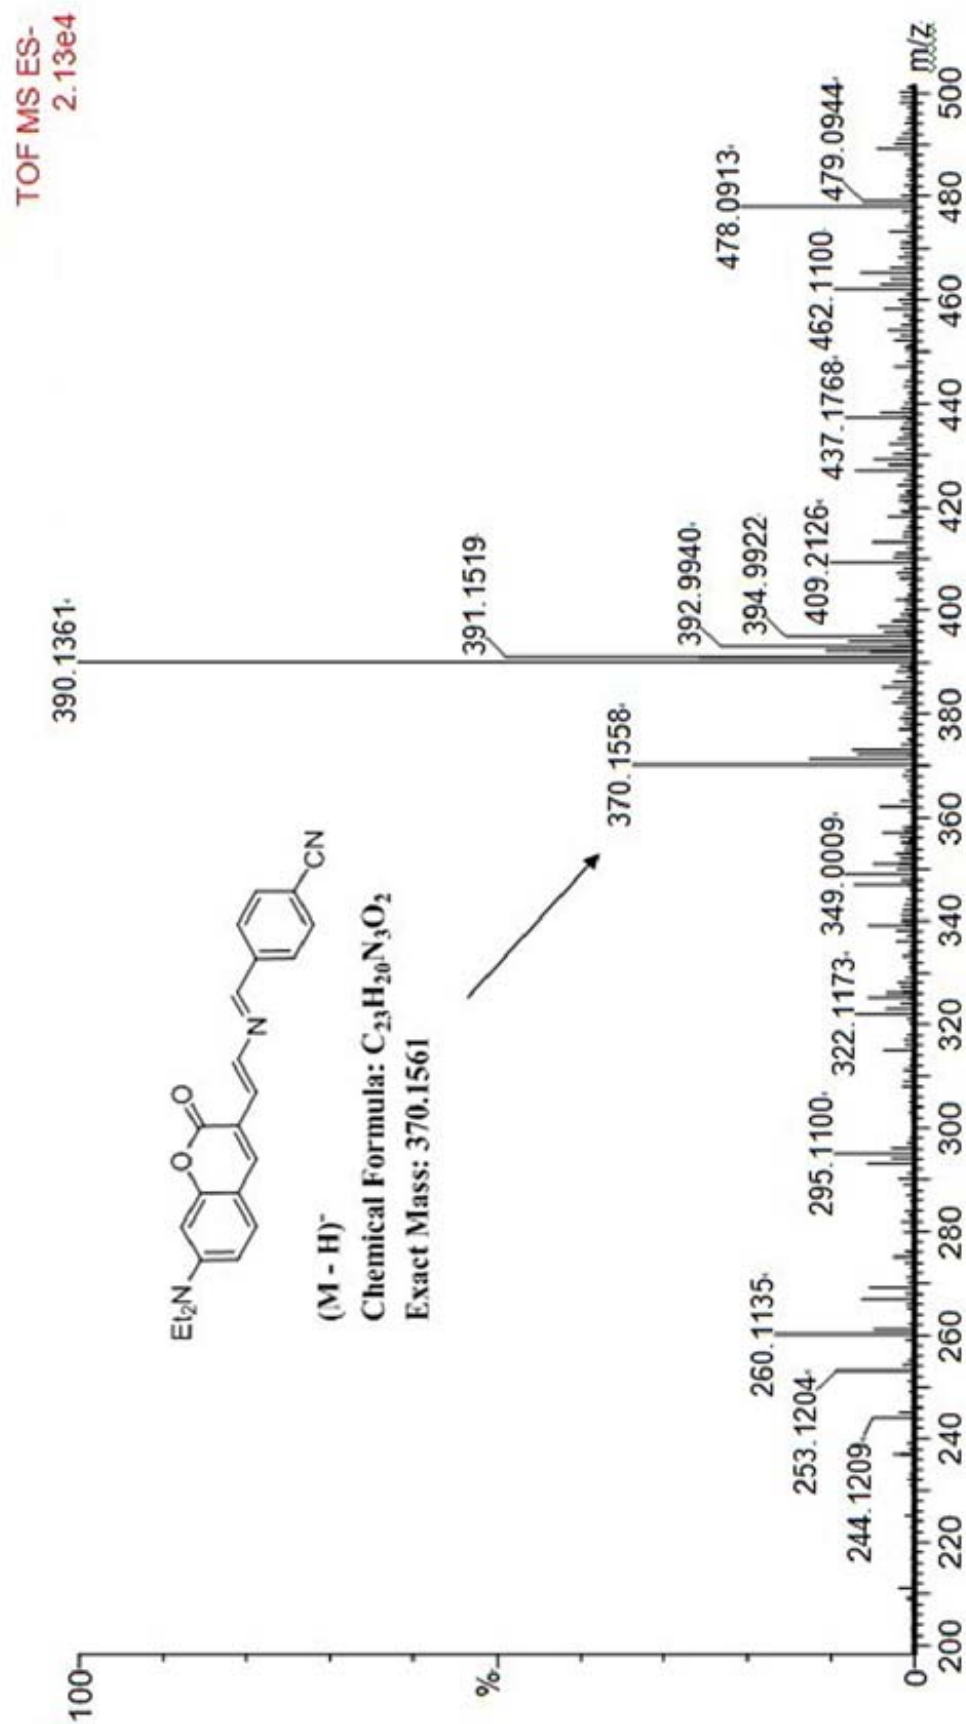

7. <sup>1</sup>H NMR and <sup>13</sup>C NMR spectra.

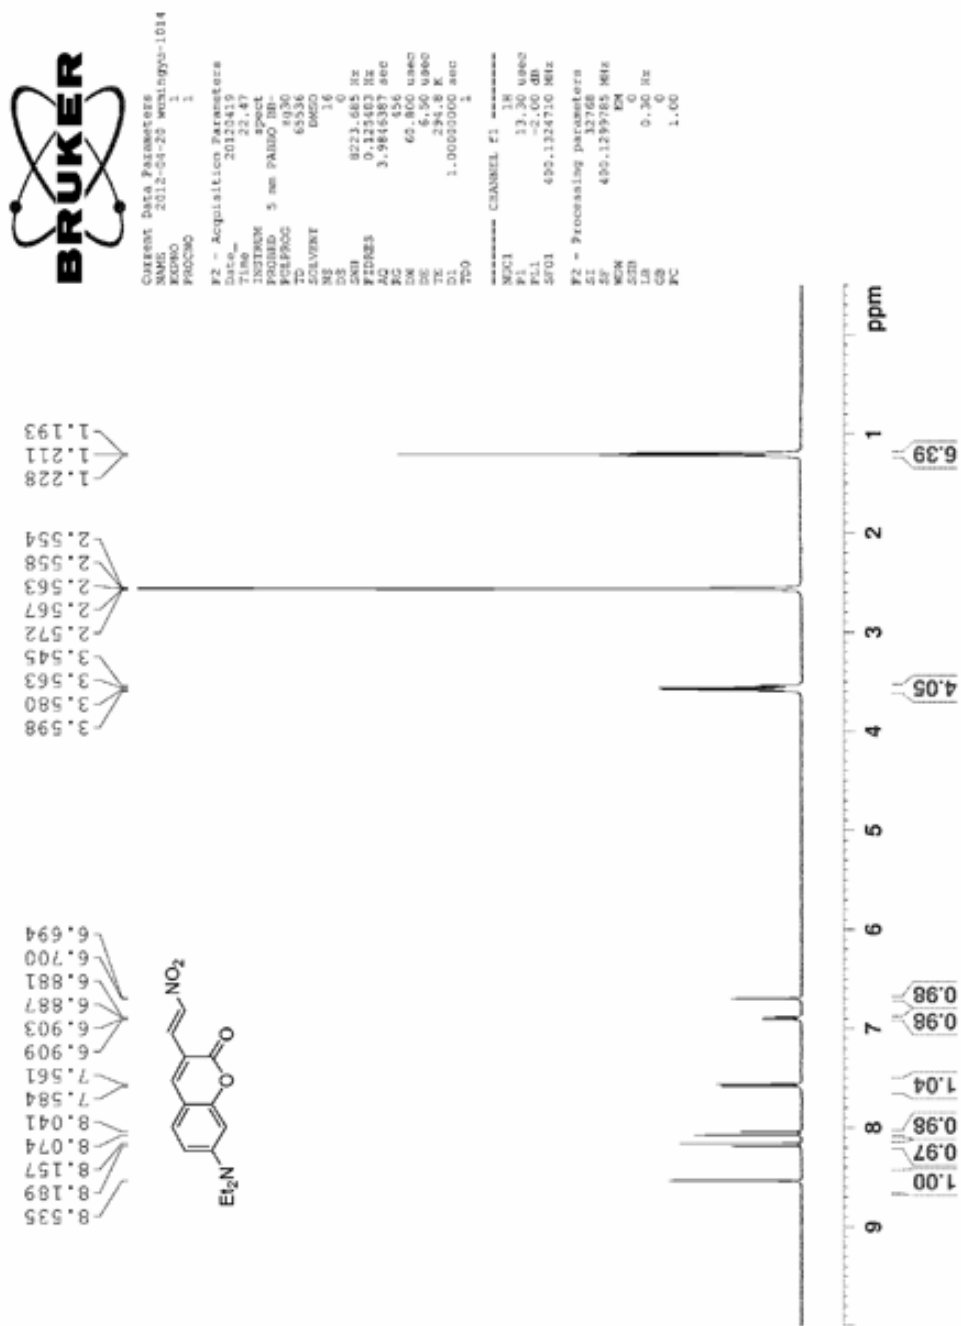



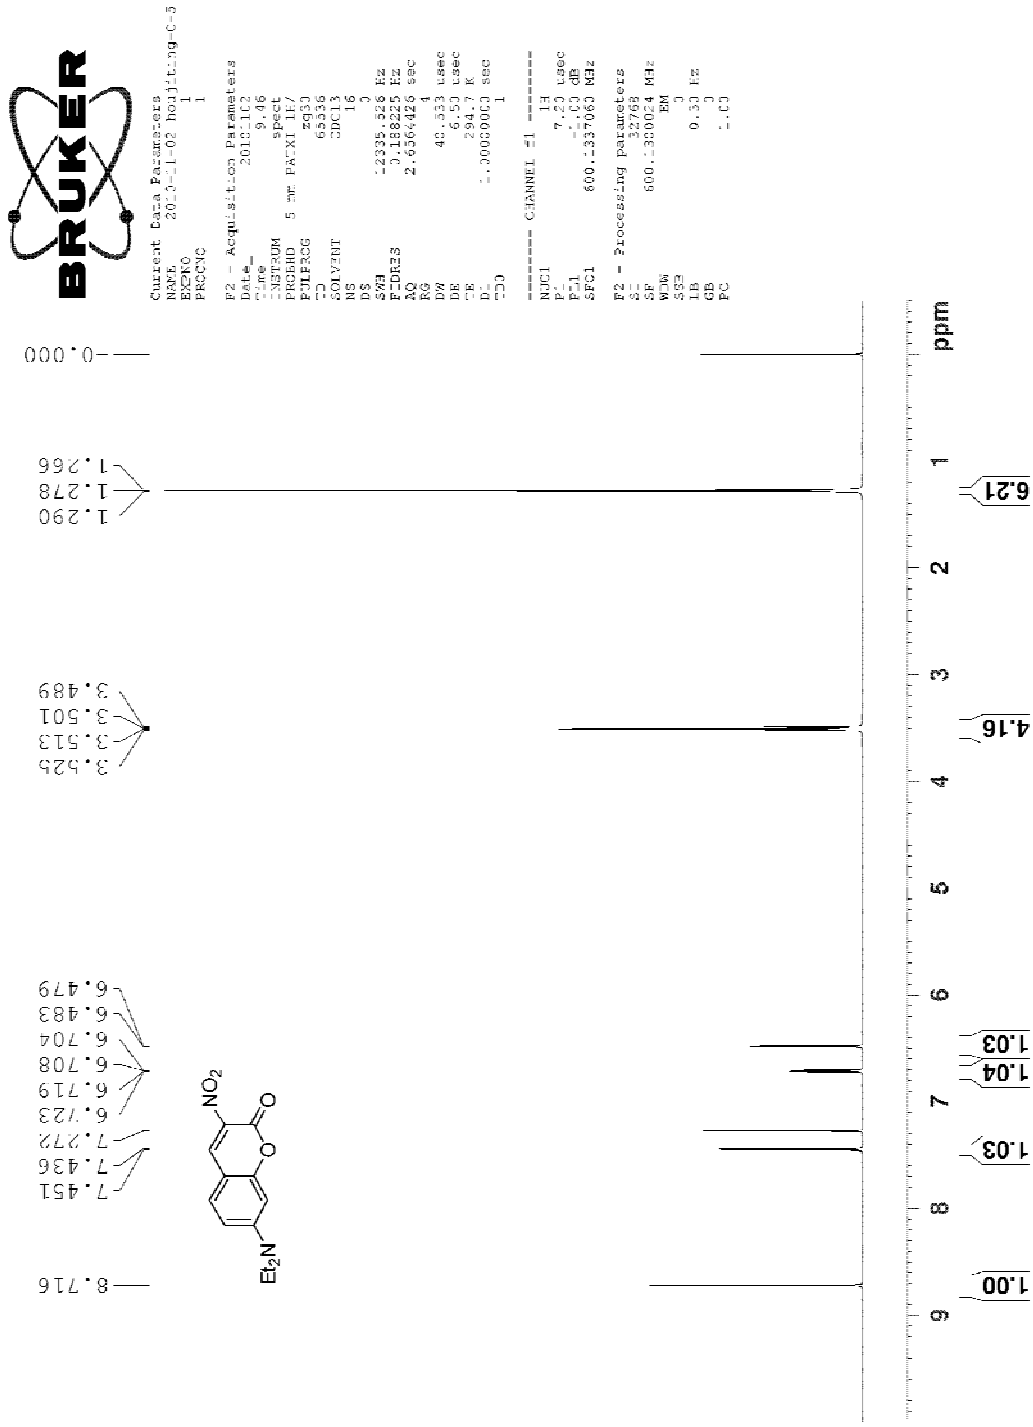

| E2 - Acquisition Parameters |               |
|-----------------------------|---------------|
| Date_____                   | 20100615      |
| Time_____                   | 15.53         |
| INSTRUM_____                | 1 Spect       |
| PROBHD_____                 | 5 mm 2BBO 5B  |
| PULPROG_____                | zgpg30        |
| TD_____                     | 65536         |
| SOLVENT_____                | CDCl3         |
| NS_____                     | 256           |
| DS_____                     | 8             |
| SWH_____                    | 24033.467 Hz  |
| FIDRES_____                 | 0.366467 Hz   |
| AQ_____                     | 1.365498 sec  |
| RG_____                     | 11.1724       |
| LE_____                     | 20.490 msec   |
| DE_____                     | 6.50 msec     |
| TE_____                     | 297.7 K       |
| DELTA_____                  | 2.0000000 sec |
| DELTA1_____                 | 0.0300000 sec |
| DELTA2_____                 |               |

|                             |     |                 |    |  |  |
|-----------------------------|-----|-----------------|----|--|--|
| <hr/>                       |     |                 |    |  |  |
| =====                       |     |                 |    |  |  |
| CHANEL #1                   | #C1 |                 |    |  |  |
| NJC1                        |     |                 |    |  |  |
| P1                          |     | 9.63 sec        |    |  |  |
| PW1                         |     | 74.0000000 W    |    |  |  |
| SF01                        |     | 100.6282993 MHz |    |  |  |
| <hr/>                       |     |                 |    |  |  |
| CHANEL #2                   | #C2 |                 |    |  |  |
| NJC2                        |     | waltale         | LH |  |  |
| PGP32                       |     | 90.00 sec       |    |  |  |
| PW2                         |     | 16.0000000 W    |    |  |  |
| PWL12                       |     | 0.19478300 W    |    |  |  |
| PWL3                        |     | 0.15774999 W    |    |  |  |
| SF02                        |     | 400.1316305 MHz |    |  |  |
| <hr/>                       |     |                 |    |  |  |
| EF2 = Processing parameters |     |                 |    |  |  |
| S1                          |     | 33768           |    |  |  |
| SF                          |     | 100.6127690 MHz |    |  |  |
| KW                          |     | EM              |    |  |  |
| SSB                         | 0   |                 |    |  |  |
| LB                          | 0   | 1.00 Hz         |    |  |  |
| PC                          | 0   |                 |    |  |  |
| EC                          |     | 1.40            |    |  |  |

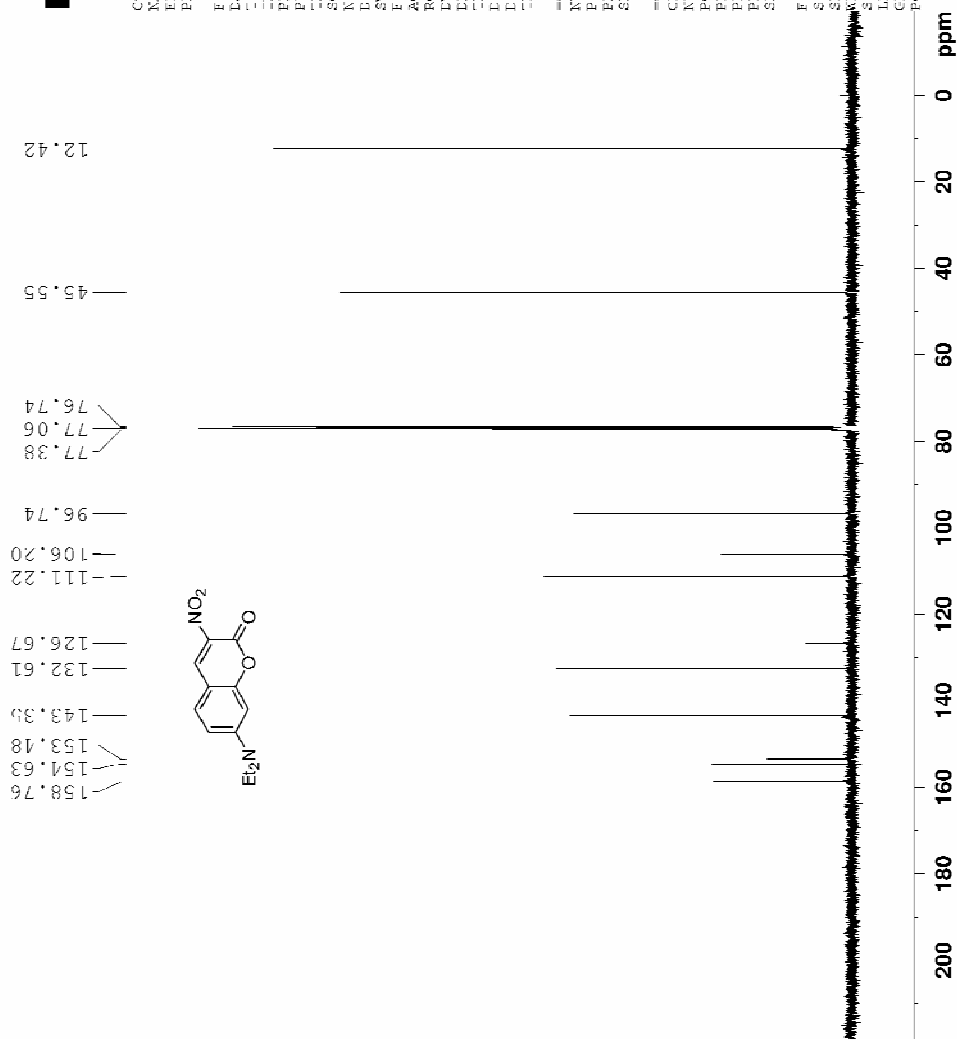

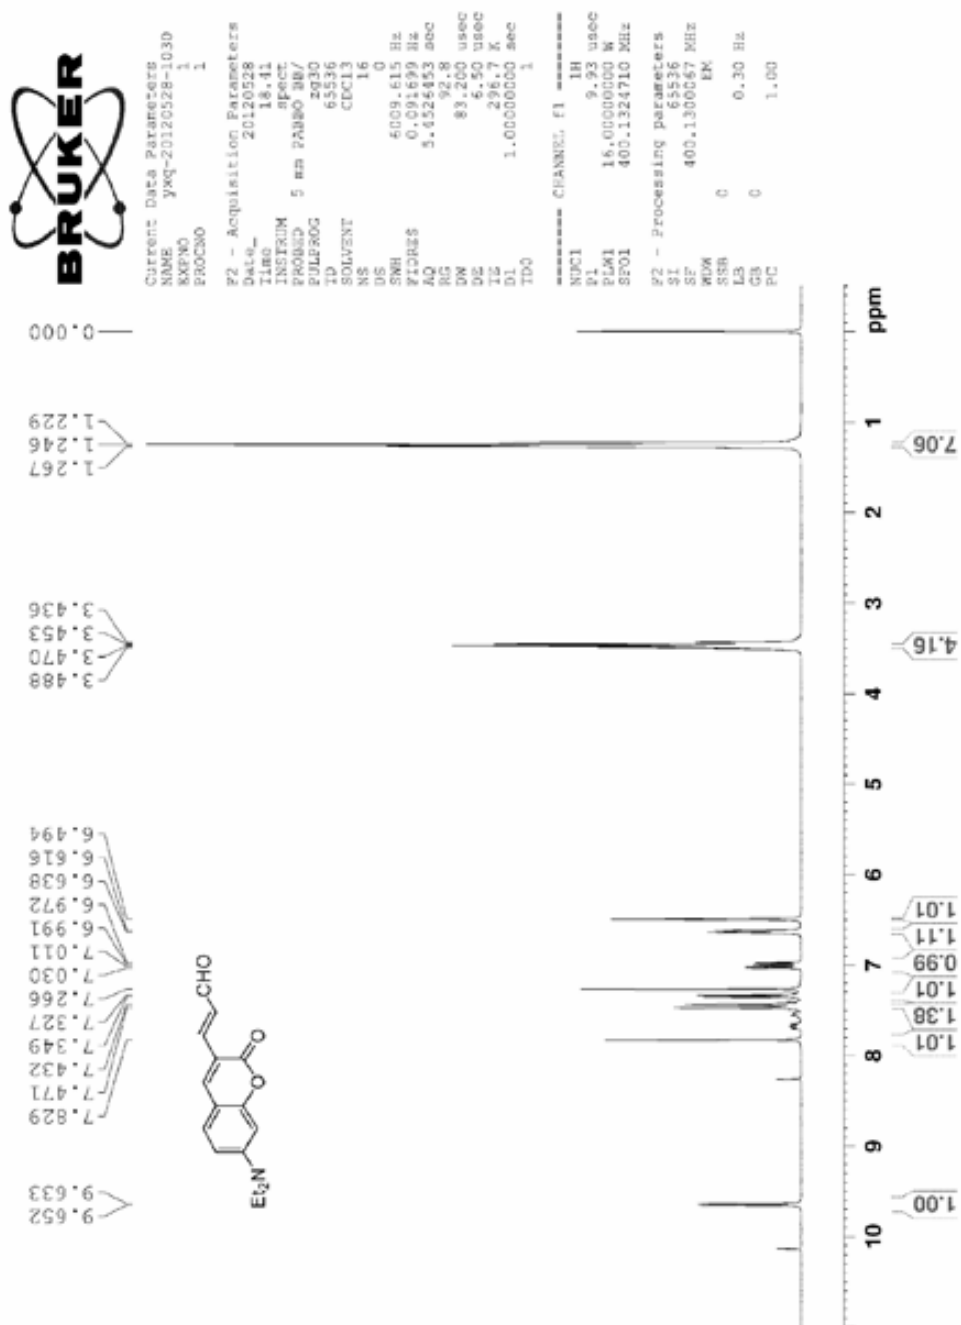

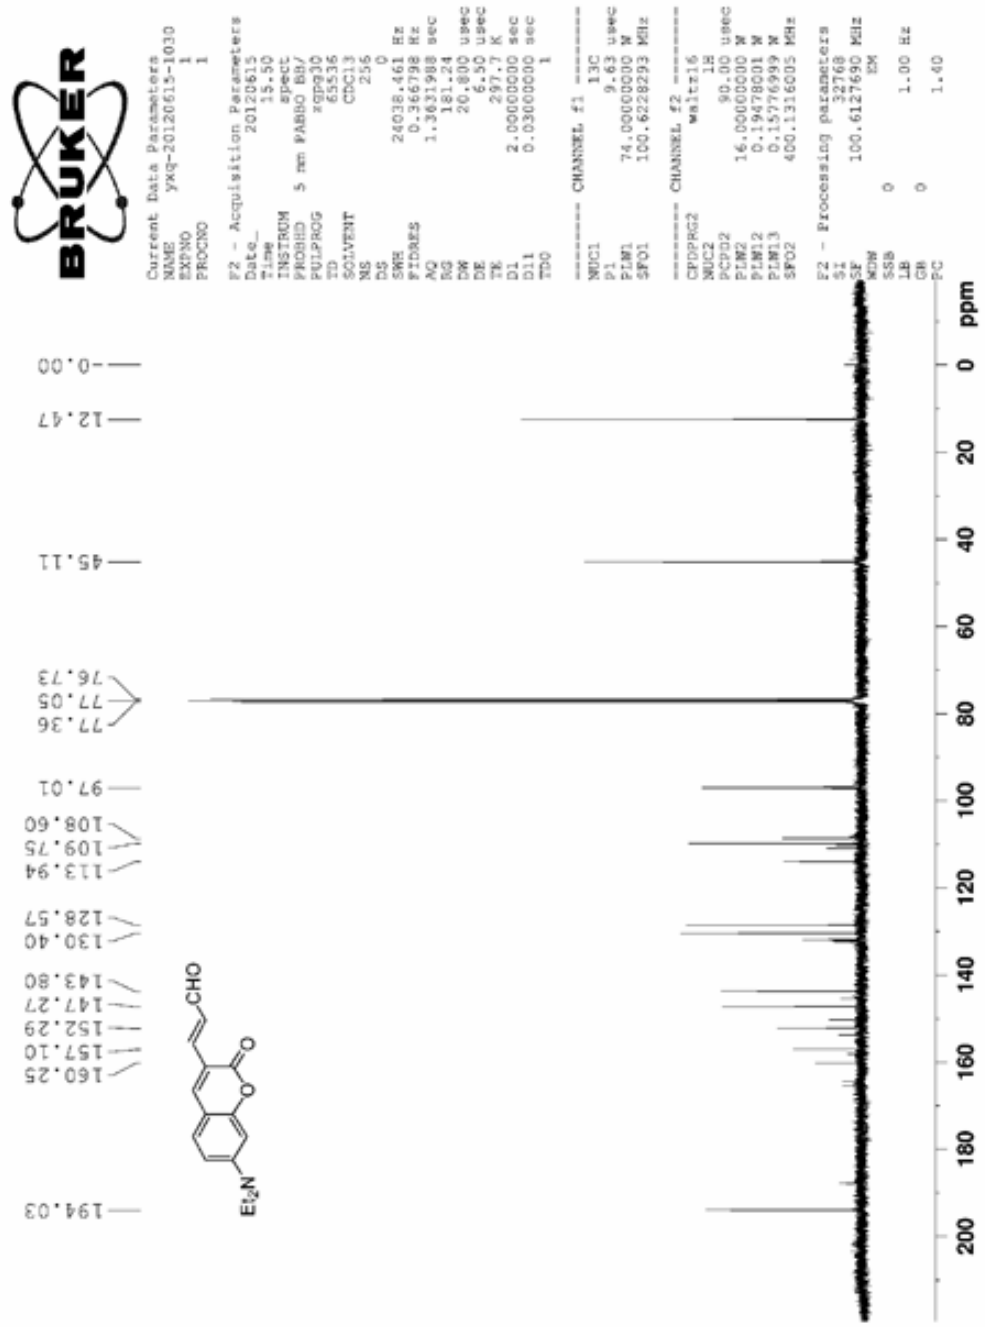

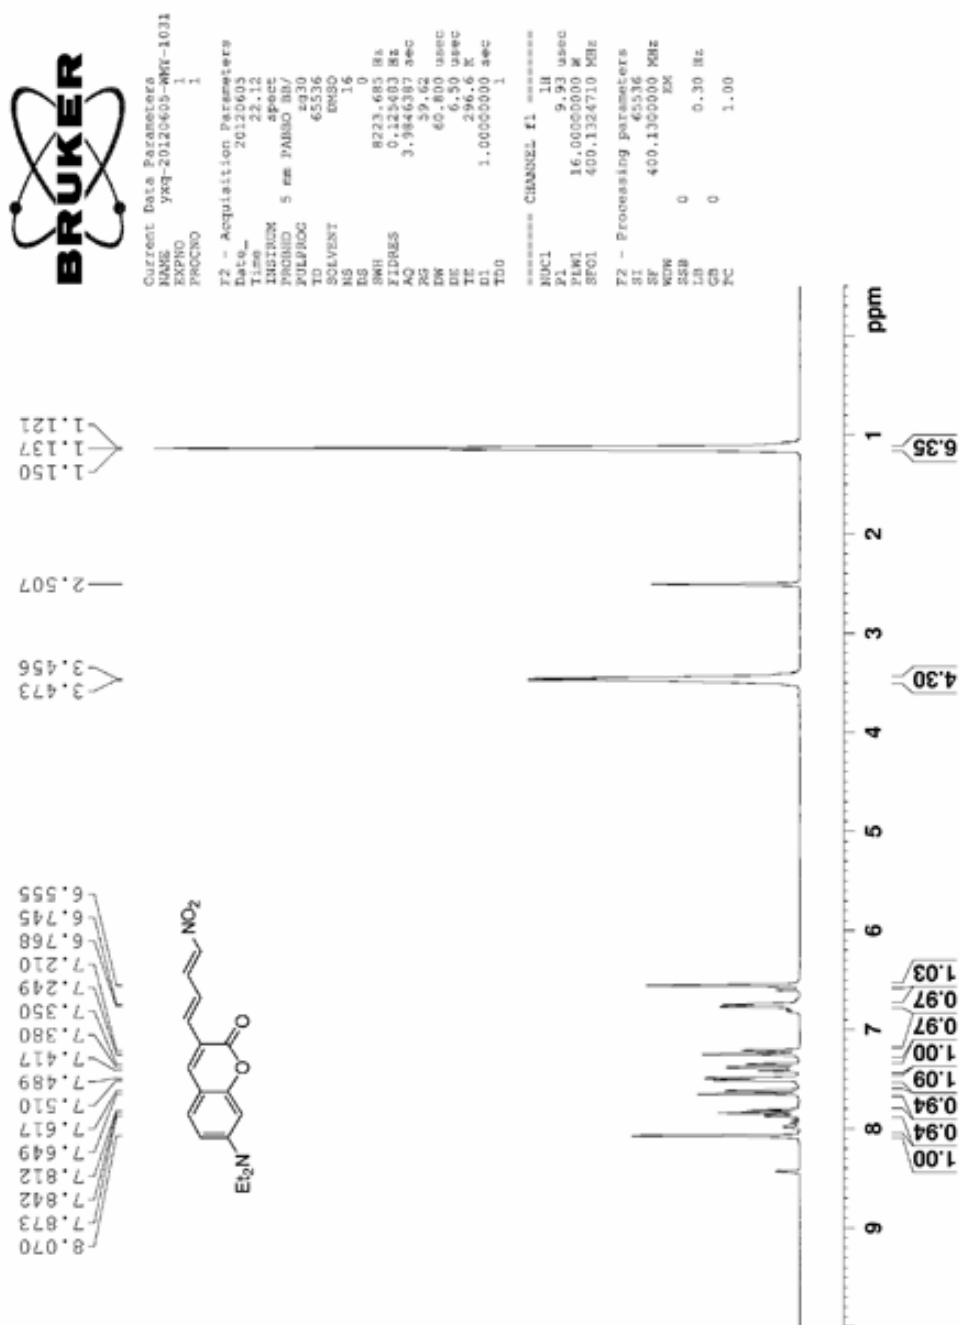

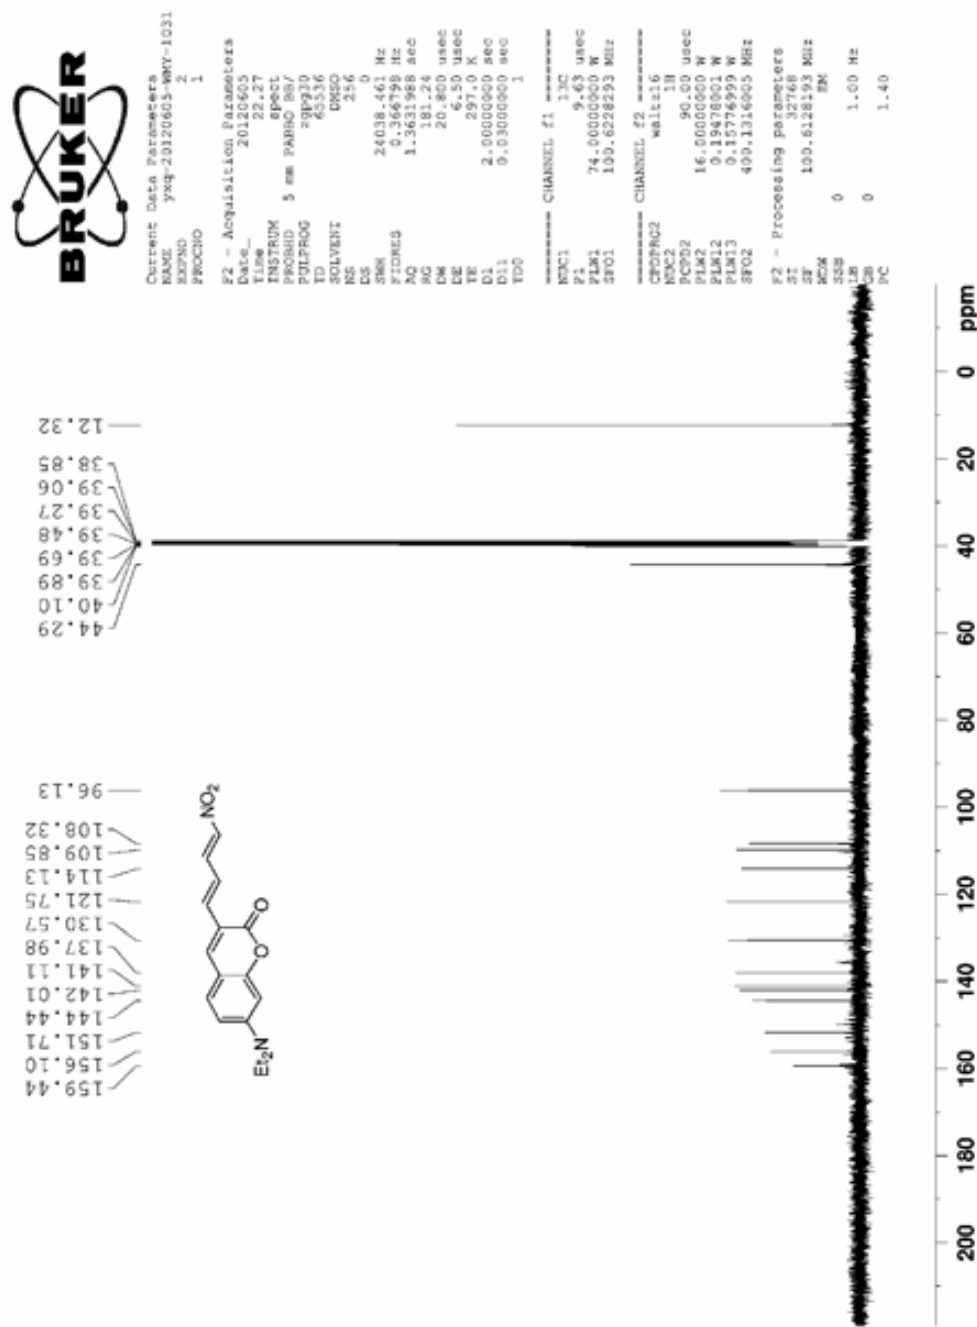

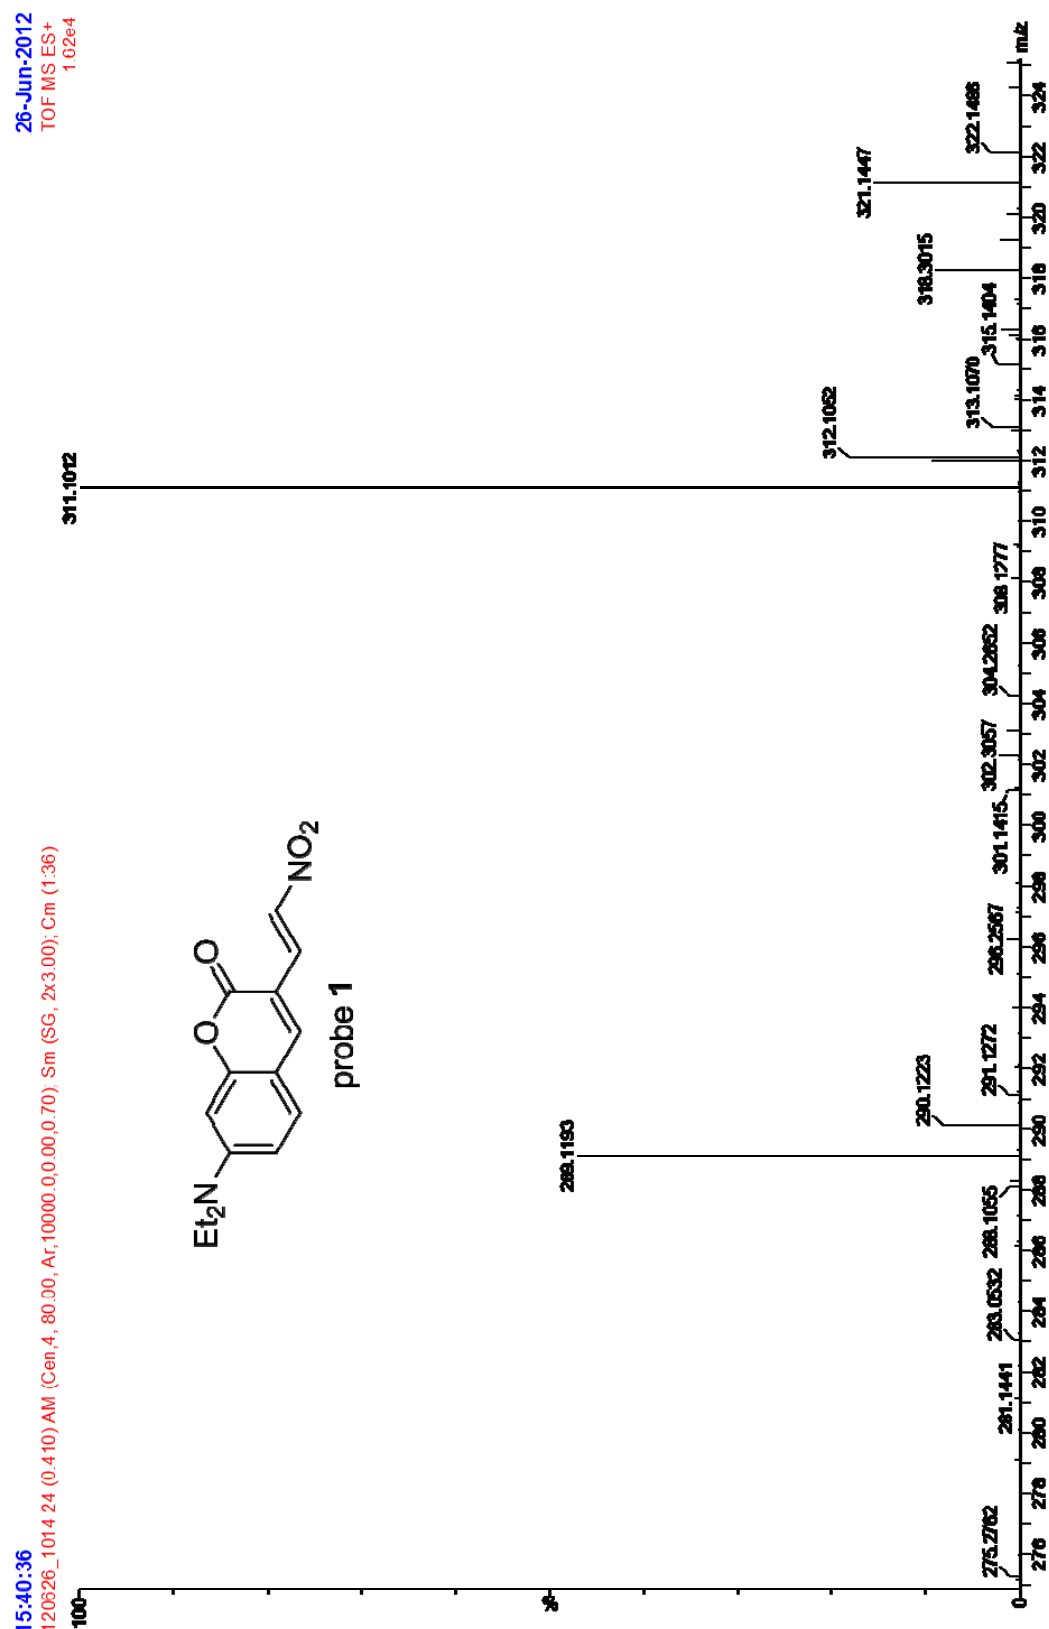

15:08:17

120614\_103113 (0.222) AM (Cen, 4, 80.00, Ar, 10000.0, 0.00, 0.70); Sm (SC, 2x3.00); Cm (6.36)

14-Jun-2012

TOF MS ES+  
2.45e4

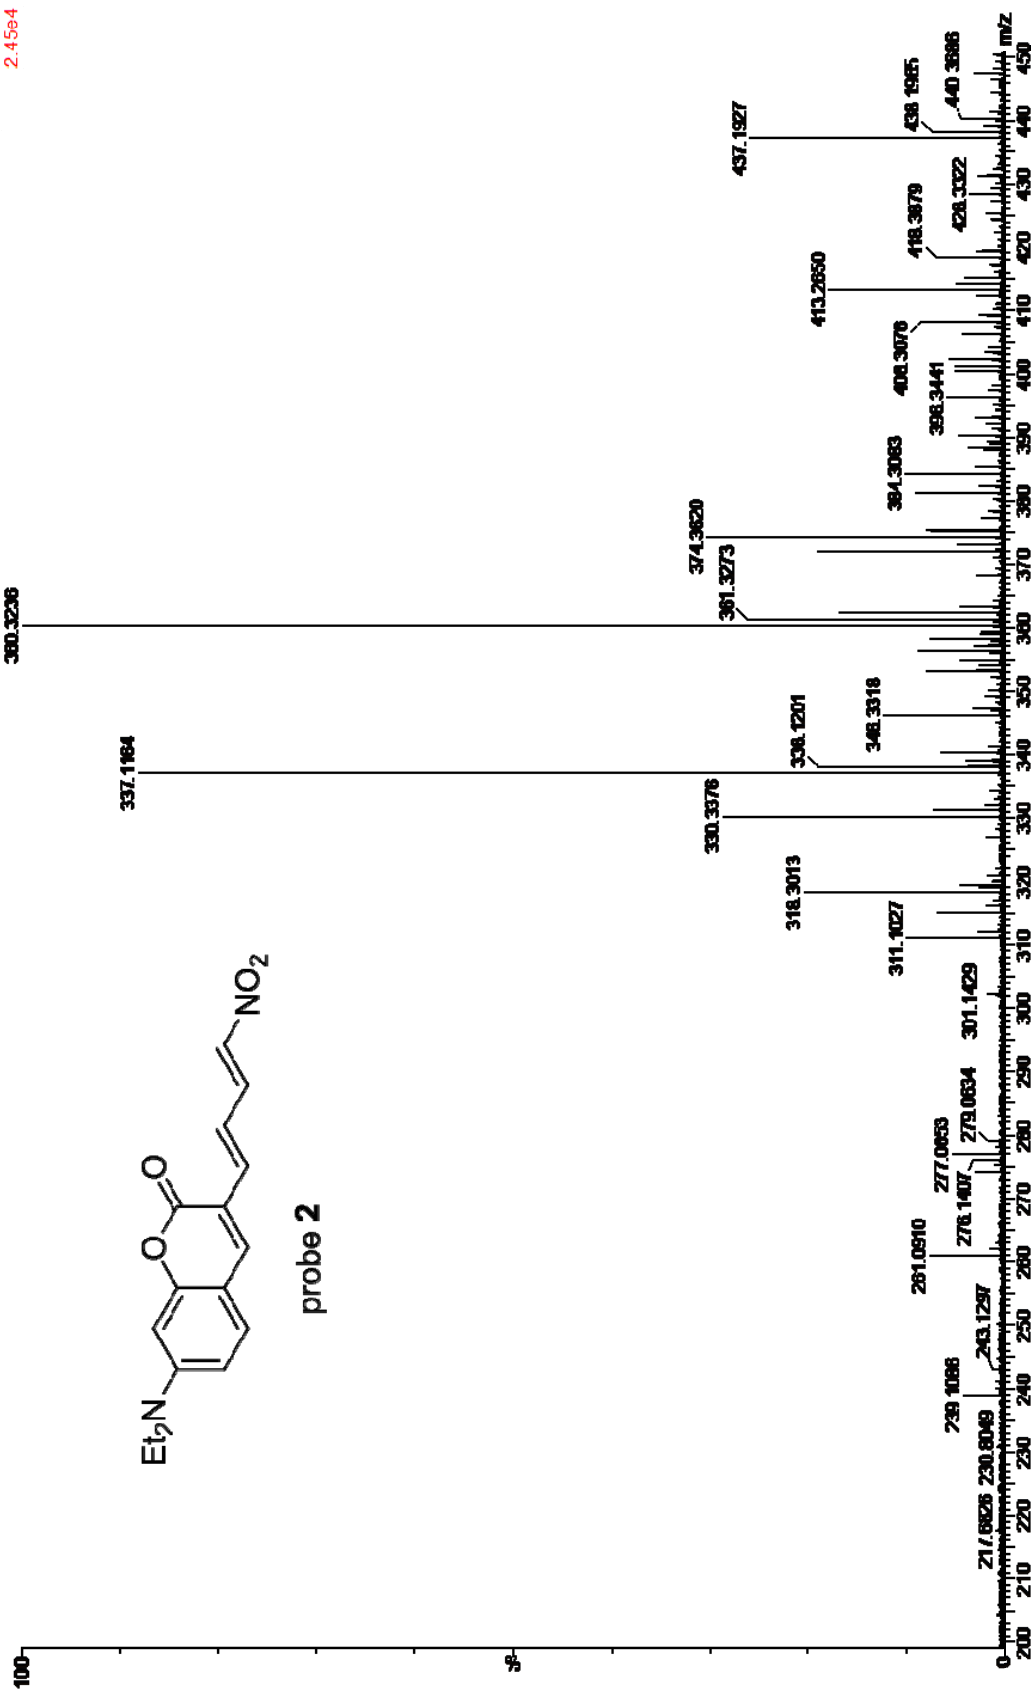

Supplement: c2ob26235e.pdf [file c2ob26235e.pdf]
